# Supplementary material for: A generalized analysis of hydrophobic and loop clusters within globular protein sequences
Source: PubMed Central journal article supplement (PMC1774571; doi:10.1186/1472-6807-7-2), 2007-01-08

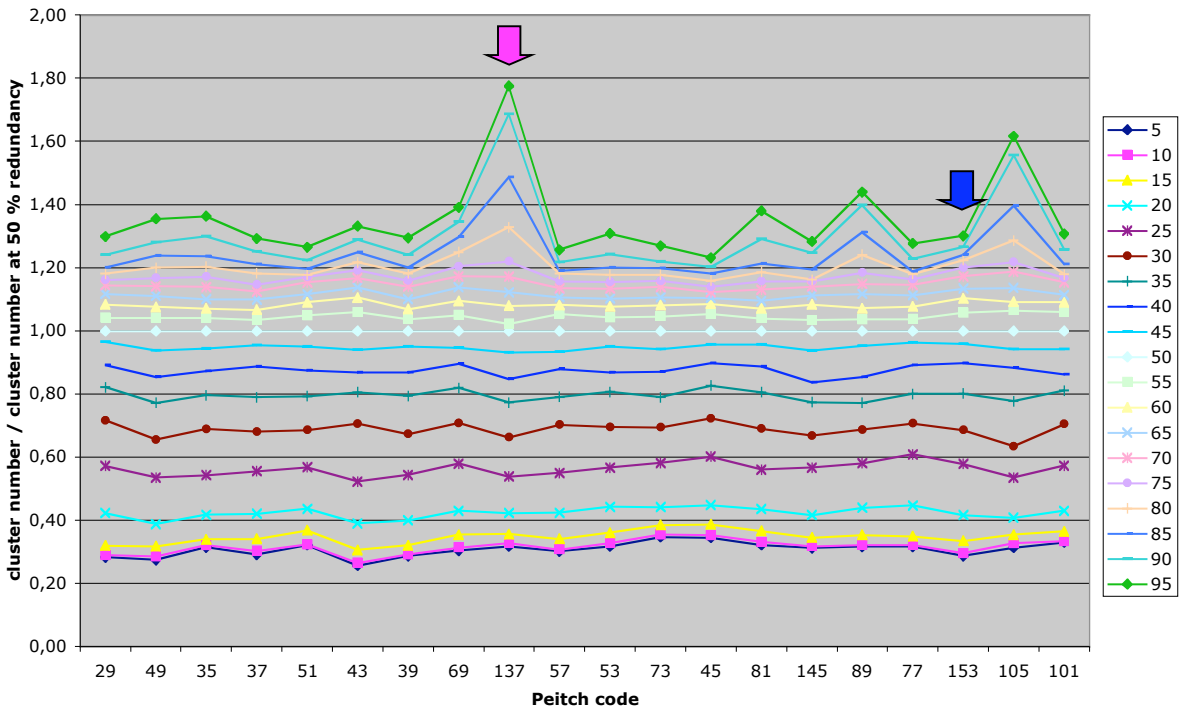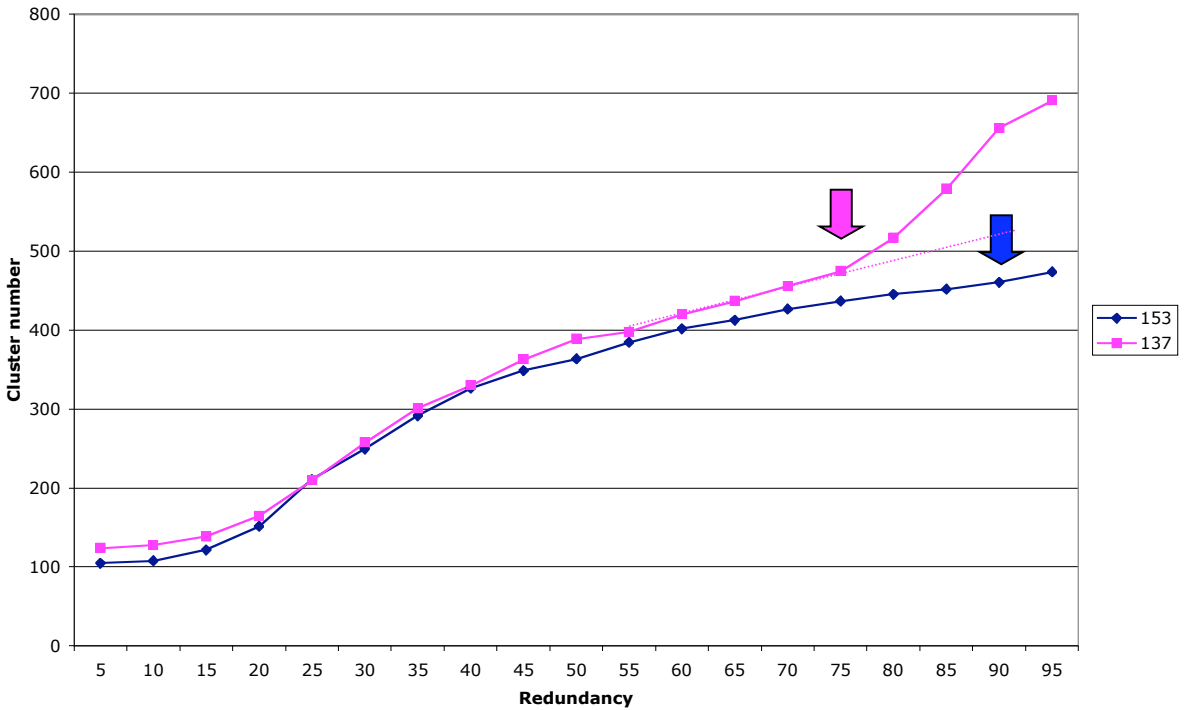

Supplement: 1472-6807-7-2-S2.pdf [file 1472-6807-7-2-S2.pdf]
