# Supplementary material for: A generalized analysis of hydrophobic and loop clusters within globular protein sequences
Source: PubMed Central journal article supplement (PMC1774571; doi:10.1186/1472-6807-7-2), 2007-01-08
Supplement: 1472-6807-7-2-S3.pdf [file 1472-6807-7-2-S3.pdf]

| HYDROPHOBIC CLUSTER |             | redundancy | number | frequency |    |    |          |    |    |    |                     |     |                         |      |      | affinity |   |
|---------------------|-------------|------------|--------|-----------|----|----|----------|----|----|----|---------------------|-----|-------------------------|------|------|----------|---|
| P. code             | binary code |            |        | APC rule  |    |    | OPS rule |    |    |    | coverage (OPS rule) |     | propensities (OPS rule) |      |      |          |   |
|                     |             |            |        | C         | E  | H  | C        | E  | H  | M  | E                   | H   | C                       | E    | H    |          | M |
| 1                   | 1           | 90         | 35079  | 63        | 17 | 20 | 63       | 17 | 20 | 0  | 100                 | 100 | 2,80                    | 0,53 | 0,68 | 0,00     | C |
| 3                   | 11          | 90         | 12910  | 40        | 33 | 27 | 32       | 38 | 29 | 1  | 86                  | 91  | 1,42                    | 1,19 | 1,01 | 0,04     | c |
| 5                   | 101         | 85         | 7851   | 45        | 40 | 15 | 30       | 49 | 19 | 2  | 81                  | 76  | 1,34                    | 1,55 | 0,65 | 0,11     | e |
| 7                   | 111         | 90         | 5118   | 23        | 63 | 14 | 12       | 70 | 16 | 2  | 89                  | 88  | 0,55                    | 2,20 | 0,54 | 0,10     | E |
| 9                   | 1001        | 90         | 4576   | 45        | 18 | 37 | 27       | 25 | 44 | 3  | 67                  | 82  | 1,21                    | 0,79 | 1,52 | 0,19     | h |
| 11                  | 1011        | 85         | 2998   | 27        | 51 | 23 | 12       | 60 | 25 | 3  | 82                  | 87  | 0,51                    | 1,93 | 0,85 | 0,18     | E |
| 13                  | 1101        | 90         | 3007   | 28        | 51 | 21 | 13       | 59 | 25 | 4  | 84                  | 80  | 0,56                    | 1,84 | 0,85 | 0,23     | E |
| 15                  | 1111        | 90         | 1847   | 12        | 81 | 7  | 4        | 86 | 8  | 2  | 93                  | 88  | 0,19                    | 2,69 | 0,27 | 0,10     | E |
| 17                  | 10001       | 80         | 2633   | 41        | 18 | 40 | 22       | 25 | 46 | 7  | 63                  | 83  | 0,95                    | 0,81 | 1,54 | 0,45     | H |
| 19                  | 10011       | 90         | 2101   | 26        | 19 | 55 | 10       | 25 | 59 | 6  | 68                  | 90  | 0,45                    | 0,79 | 2,03 | 0,34     | H |
| 21                  | 10101       | 80         | 1887   | 29        | 57 | 14 | 11       | 66 | 16 | 6  | 82                  | 77  | 0,49                    | 2,15 | 0,54 | 0,37     | E |
| 23                  | 10111       | 90         | 1177   | 17        | 61 | 23 | 5        | 70 | 24 | 2  | 86                  | 94  | 0,20                    | 2,18 | 0,81 | 0,13     | E |
| 25                  | 11001       | 85         | 2143   | 26        | 24 | 51 | 10       | 28 | 56 | 6  | 76                  | 87  | 0,43                    | 0,89 | 1,90 | 0,38     | H |
| 27                  | 11011       | 90         | 1191   | 17        | 35 | 47 | 5        | 39 | 50 | 5  | 84                  | 91  | 0,23                    | 1,23 | 1,73 | 0,32     | h |
| 29                  | 11101       | 90         | 1079   | 18        | 65 | 17 | 5        | 71 | 19 | 5  | 87                  | 88  | 0,21                    | 2,23 | 0,65 | 0,31     | E |
| 31                  | 11111       | 90         | 416    | 10        | 78 | 13 | 2        | 82 | 14 | 2  | 93                  | 93  | 0,11                    | 2,57 | 0,47 | 0,10     | E |
| 35                  | 100011      | 90         | 1019   | 36        | 27 | 37 | 14       | 35 | 39 | 12 | 66                  | 82  | 0,60                    | 1,11 | 1,33 | 0,75     | h |
| 37                  | 100101      | 90         | 1002   | 42        | 36 | 23 | 13       | 46 | 28 | 12 | 67                  | 69  | 0,58                    | 1,44 | 0,98 | 0,76     | E |
| 39                  | 100111      | 90         | 698    | 24        | 47 | 29 | 4        | 55 | 29 | 12 | 74                  | 88  | 0,16                    | 1,73 | 0,98 | 0,77     | E |
| 41                  | 101001      | 90         | 1086   | 39        | 37 | 24 | 12       | 46 | 29 | 13 | 70                  | 69  | 0,55                    | 1,44 | 0,98 | 0,79     | E |
| 43                  | 101011      | 90         | 752    | 24        | 58 | 18 | 5        | 69 | 20 | 5  | 81                  | 79  | 0,22                    | 2,17 | 0,70 | 0,33     | E |
| 45                  | 101101      | 90         | 627    | 25        | 61 | 14 | 5        | 71 | 15 | 8  | 80                  | 78  | 0,24                    | 2,23 | 0,53 | 0,47     | E |
| 47                  | 101111      | 90         | 311    | 16        | 73 | 11 | 1        | 83 | 11 | 5  | 85                  | 85  | 0,06                    | 2,60 | 0,36 | 0,30     | E |
| 49                  | 110001      | 90         | 1074   | 37        | 28 | 35 | 11       | 36 | 41 | 12 | 64                  | 79  | 0,51                    | 1,13 | 1,39 | 0,72     | h |
| 51                  | 110011      | 90         | 786    | 20        | 18 | 62 | 5        | 23 | 65 | 7  | 68                  | 92  | 0,24                    | 0,72 | 2,22 | 0,42     | H |
| 53                  | 110101      | 90         | 639    | 24        | 61 | 16 | 5        | 69 | 17 | 9  | 82                  | 79  | 0,23                    | 2,16 | 0,59 | 0,53     | E |
| 55                  | 110111      | 90         | 251    | 12        | 47 | 41 | 4        | 49 | 43 | 5  | 90                  | 94  | 0,18                    | 1,52 | 1,46 | 0,29     | e |
| 57                  | 111001      | 90         | 648    | 28        | 45 | 27 | 6        | 55 | 29 | 10 | 73                  | 86  | 0,25                    | 1,71 | 1,01 | 0,63     | e |
| 59                  | 111011      | 90         | 338    | 15        | 50 | 35 | 2        | 58 | 35 | 5  | 83                  | 95  | 0,08                    | 1,80 | 1,21 | 0,33     | e |
| 61                  | 111101      | 90         | 310    | 15        | 80 | 5  | 1        | 87 | 5  | 7  | 87                  | 80  | 0,04                    | 2,73 | 0,15 | 0,44     | E |
| 63                  | 111111      | 90         | 84     | 7         | 82 | 11 | 1        | 86 | 10 | 4  | 93                  | 100 | 0,05                    | 2,68 | 0,33 | 0,22     | E |
| 69                  | 1000101     | 90         | 689    | 41        | 27 | 31 | 12       | 35 | 36 | 17 | 58                  | 75  | 0,51                    | 1,09 | 1,24 | 1,07     | h |
| 71                  | 1000111     | 90         | 306    | 39        | 39 | 21 | 9        | 48 | 21 | 22 | 63                  | 77  | 0,41                    | 1,51 | 0,72 | 1,32     | e |
| 73                  | 1001001     | 90         | 628    | 37        | 18 | 46 | 11       | 22 | 51 | 17 | 53                  | 79  | 0,47                    | 0,69 | 1,74 | 1,04     | h |
| 75                  | 1001011     | 90         | 293    | 30        | 44 | 25 | 6        | 54 | 25 | 15 | 72                  | 82  | 0,26                    | 1,70 | 0,84 | 0,94     | E |
| 77                  | 1001101     | 90         | 488    | 27        | 34 | 39 | 5        | 41 | 41 | 12 | 72                  | 84  | 0,22                    | 1,29 | 1,42 | 0,76     | h |
| 79                  | 1001111     | 90         | 177    | 22        | 59 | 20 | 1        | 66 | 19 | 14 | 77                  | 90  | 0,05                    | 2,05 | 0,66 | 0,87     | E |
| 81                  | 1010001     | 85         | 545    | 41        | 30 | 29 | 12       | 39 | 32 | 17 | 61                  | 77  | 0,53                    | 1,25 | 1,09 | 1,01     | e |
| 83                  | 1010011     | 90         | 379    | 31        | 30 | 40 | 7        | 32 | 38 | 23 | 72                  | 78  | 0,29                    | 1,00 | 1,31 | 1,43     | m |
| 85                  | 1010101     | 85         | 364    | 28        | 59 | 13 | 6        | 70 | 14 | 10 | 79                  | 72  | 0,25                    | 2,23 | 0,48 | 0,62     | E |
| 87                  | 1010111     | 90         | 158    | 19        | 64 | 17 | 3        | 68 | 16 | 13 | 86                  | 86  | 0,11                    | 2,14 | 0,54 | 0,82     | E |
| 89                  | 1011001     | 80         | 442    | 23        | 42 | 34 | 6        | 50 | 35 | 10 | 78                  | 90  | 0,26                    | 1,61 | 1,16 | 0,59     | e |
| 91                  | 1011011     | 75         | 165    | 21        | 48 | 31 | 4        | 55 | 33 | 8  | 80                  | 87  | 0,18                    | 1,79 | 1,11 | 0,48     | e |
| 93                  | 1011101     | 90         | 182    | 19        | 60 | 21 | 1        | 71 | 22 | 6  | 82                  | 85  | 0,05                    | 2,22 | 0,75 | 0,37     | E |
| 95                  | 1011111     | 90         | 50     | 9         | 81 | 10 | 0        | 88 | 10 | 2  | 90                  | 100 | 0,00                    | 2,75 | 0,34 | 0,12     | E |
| 99                  | 1100011     | 90         | 298    | 36        | 34 | 30 | 7        | 36 | 31 | 27 | 67                  | 76  | 0,30                    | 1,12 | 1,06 | 1,63     | m |
| 101                 | 1100101     | 90         | 440    | 31        | 33 | 36 | 4        | 38 | 42 | 17 | 70                  | 75  | 0,18                    | 1,17 | 1,44 | 1,02     | h |
| 103                 | 1100111     | 90         | 174    | 19        | 42 | 39 | 3        | 44 | 37 | 16 | 81                  | 88  | 0,13                    | 1,38 | 1,28 | 0,95     | e |
| 105                 | 1101001     | 80         | 377    | 37        | 42 | 21 | 6        | 52 | 23 | 20 | 67                  | 65  | 0,25                    | 1,68 | 0,76 | 1,20     | e |
| 107                 | 1101011     | 85         | 206    | 23        | 61 | 16 | 4        | 66 | 15 | 16 | 83                  | 76  | 0,17                    | 2,09 | 0,51 | 0,95     | E |
| 109                 | 1101101     | 90         | 211    | 21        | 50 | 30 | 2        | 55 | 32 | 11 | 82                  | 83  | 0,08                    | 1,72 | 1,11 | 0,67     | e |
| 111                 | 1101111     | 90         | 57     | 16        | 67 | 17 | 2        | 72 | 19 | 7  | 85                  | 87  | 0,08                    | 2,25 | 0,66 | 0,43     | E |
| 113                 | 1110001     | 90         | 353    | 35        | 44 | 21 | 6        | 54 | 22 | 18 | 67                  | 75  | 0,25                    | 1,68 | 0,77 | 1,11     | e |
| 115                 | 1110011     | 90         | 217    | 21        | 42 | 37 | 3        | 47 | 34 | 17 | 77                  | 90  | 0,12                    | 1,45 | 1,15 | 1,05     | e |
| 117                 | 1110101     | 90         | 182    | 20        | 68 | 12 | 3        | 74 | 13 | 10 | 85                  | 83  | 0,15                    | 2,30 | 0,43 | 0,64     | E |
| 119                 | 1110111     | 90         | 55     | 12        | 46 | 41 | 2        | 51 | 42 | 5  | 87                  | 94  | 0,08                    | 1,59 | 1,44 | 0,33     | e |
| 121                 | 1111001     | 90         | 204    | 31        | 55 | 14 | 3        | 65 | 14 | 18 | 69                  | 81  | 0,13                    | 2,04 | 0,49 | 1,08     | e |
| 123                 | 1111011     | 90         | 52     | 17        | 68 | 15 | 0        | 73 | 13 | 13 | 85                  | 92  | 0,00                    | 2,28 | 0,46 | 0,83     | E |
| 125                 | 1111101     | 90         | 47     | 12        | 71 | 16 | 0        | 81 | 17 | 2  | 86                  | 95  | 0,00                    | 2,53 | 0,58 | 0,13     | E |

| HYDROPHOBIC CLUSTER |             | redundancy | number | frequency |    |    |          |    |    |    |                     |     |                         |      |      | affinity |   |
|---------------------|-------------|------------|--------|-----------|----|----|----------|----|----|----|---------------------|-----|-------------------------|------|------|----------|---|
| P-code              | binary code |            |        | APC rule  |    |    | OPS rule |    |    |    | coverage (OPS rule) |     | propensities (OPS rule) |      |      |          |   |
|                     |             |            |        | C         | E  | H  | C        | E  | H  | M  | E                   | H   | C                       | E    | H    |          | M |
| 137                 | 10001001    | 75         | 475    | 30        | 11 | 59 | 9        | 14 | 63 | 14 | 49                  | 87  | 0,39                    | 0,45 | 2,10 | 0,86     | H |
| 139                 | 10001011    | 90         | 308    | 30        | 27 | 43 | 5        | 36 | 43 | 15 | 58                  | 87  | 0,23                    | 1,14 | 1,48 | 0,94     | h |
| 141                 | 10001101    | 90         | 269    | 36        | 36 | 28 | 11       | 37 | 30 | 22 | 67                  | 81  | 0,48                    | 1,16 | 1,03 | 1,35     | m |
| 143                 | 10001111    | 90         | 109    | 29        | 58 | 13 | 2        | 64 | 10 | 24 | 70                  | 92  | 0,08                    | 2,01 | 0,35 | 1,46     | e |
| 145                 | 10010001    | 90         | 505    | 29        | 12 | 60 | 9        | 13 | 63 | 15 | 57                  | 87  | 0,41                    | 0,40 | 2,15 | 0,94     | H |
| 147                 | 10010011    | 90         | 366    | 20        | 10 | 70 | 4        | 12 | 74 | 10 | 58                  | 89  | 0,18                    | 0,38 | 2,54 | 0,59     | H |
| 149                 | 10010101    | 90         | 213    | 31        | 46 | 23 | 7        | 54 | 26 | 14 | 74                  | 77  | 0,29                    | 1,69 | 0,89 | 0,84     | E |
| 151                 | 10010111    | 90         | 125    | 23        | 47 | 30 | 2        | 51 | 27 | 19 | 75                  | 85  | 0,11                    | 1,60 | 0,93 | 1,18     | e |
| 153                 | 10011001    | 90         | 461    | 16        | 9  | 75 | 3        | 11 | 81 | 5  | 66                  | 91  | 0,13                    | 0,35 | 2,78 | 0,29     | H |
| 155                 | 10011011    | 85         | 228    | 16        | 20 | 64 | 1        | 26 | 63 | 10 | 65                  | 96  | 0,06                    | 0,83 | 2,12 | 0,62     | H |
| 157                 | 10011101    | 90         | 146    | 17        | 45 | 38 | 3        | 47 | 37 | 14 | 81                  | 94  | 0,12                    | 1,46 | 1,27 | 0,84     | e |
| 159                 | 10011111    | 75         | 52     | 16        | 42 | 42 | 0        | 48 | 42 | 10 | 78                  | 91  | 0,00                    | 1,57 | 1,41 | 0,59     | e |
| 163                 | 10100011    | 90         | 214    | 33        | 34 | 33 | 8        | 29 | 31 | 31 | 66                  | 87  | 0,37                    | 0,91 | 1,07 | 1,92     | m |
| 165                 | 10100101    | 90         | 230    | 36        | 50 | 14 | 11       | 50 | 13 | 26 | 75                  | 68  | 0,48                    | 1,58 | 0,45 | 1,58     | E |
| 167                 | 10100111    | 90         | 130    | 29        | 44 | 26 | 2        | 39 | 22 | 36 | 68                  | 83  | 0,10                    | 1,23 | 0,77 | 2,22     | m |
| 169                 | 10101001    | 80         | 276    | 29        | 47 | 24 | 4        | 55 | 24 | 17 | 69                  | 84  | 0,16                    | 1,80 | 0,80 | 1,04     | e |
| 171                 | 10101011    | 90         | 125    | 25        | 62 | 13 | 3        | 69 | 14 | 14 | 79                  | 84  | 0,14                    | 2,15 | 0,47 | 0,88     | E |
| 173                 | 10101101    | 90         | 102    | 26        | 60 | 13 | 2        | 67 | 13 | 19 | 75                  | 83  | 0,09                    | 2,08 | 0,44 | 1,14     | e |
| 175                 | 10101111    | 90         | 41     | 20        | 66 | 14 | 0        | 68 | 15 | 17 | 83                  | 75  | 0,00                    | 2,13 | 0,50 | 1,05     | E |
| 177                 | 10110001    | 90         | 256    | 27        | 33 | 40 | 4        | 37 | 41 | 18 | 65                  | 89  | 0,17                    | 1,16 | 1,39 | 1,13     | h |
| 179                 | 10110011    | 75         | 156    | 14        | 24 | 62 | 3        | 26 | 62 | 9  | 80                  | 94  | 0,11                    | 0,86 | 2,07 | 0,55     | H |
| 181                 | 10110101    | 90         | 131    | 27        | 63 | 10 | 2        | 72 | 9  | 18 | 75                  | 63  | 0,07                    | 2,24 | 0,31 | 1,08     | E |
| 183                 | 10110111    | 90         | 73     | 12        | 50 | 38 | 0        | 55 | 34 | 11 | 86                  | 96  | 0,00                    | 1,71 | 1,18 | 0,67     | e |
| 185                 | 10111001    | 90         | 163    | 18        | 40 | 42 | 2        | 50 | 42 | 6  | 76                  | 94  | 0,11                    | 1,55 | 1,45 | 0,34     | e |
| 187                 | 10111011    | 90         | 66     | 16        | 50 | 34 | 2        | 72 | 19 | 7  | 85                  | 87  | 0,08                    | 2,25 | 0,66 | 0,43     | E |
| 189                 | 10111101    | 90         | 49     | 17        | 77 | 6  | 0        | 86 | 6  | 8  | 83                  | 92  | 0,00                    | 2,68 | 0,21 | 0,50     | E |
| 197                 | 11000101    | 90         | 182    | 32        | 31 | 37 | 5        | 30 | 38 | 27 | 63                  | 81  | 0,22                    | 0,93 | 1,32 | 1,65     | m |
| 199                 | 11000111    | 90         | 127    | 31        | 50 | 19 | 1        | 35 | 20 | 43 | 69                  | 75  | 0,03                    | 1,11 | 0,70 | 2,66     | M |
| 201                 | 11001001    | 90         | 331    | 23        | 13 | 64 | 2        | 55 | 32 | 11 | 82                  | 83  | 0,08                    | 1,72 | 1,11 | 0,67     | e |
| 203                 | 11001011    | 90         | 159    | 36        | 35 | 30 | 9        | 44 | 31 | 16 | 65                  | 78  | 0,39                    | 1,38 | 1,08 | 0,97     | e |
| 205                 | 11001101    | 90         | 127    | 20        | 31 | 49 | 0        | 35 | 55 | 9  | 74                  | 85  | 0,00                    | 1,11 | 1,89 | 0,58     | h |
| 207                 | 11001111    | 90         | 58     | 16        | 67 | 17 | 0        | 36 | 31 | 33 | 74                  | 85  | 0,00                    | 1,13 | 1,07 | 2,01     | m |
| 209                 | 11010001    | 90         | 256    | 29        | 32 | 38 | 3        | 38 | 41 | 18 | 65                  | 82  | 0,14                    | 1,18 | 1,42 | 1,08     | h |
| 211                 | 11010011    | 90         | 146    | 27        | 31 | 42 | 5        | 28 | 40 | 27 | 70                  | 87  | 0,21                    | 0,88 | 1,39 | 1,64     | m |
| 213                 | 11010101    | 90         | 102    | 24        | 53 | 23 | 3        | 62 | 25 | 11 | 80                  | 77  | 0,13                    | 1,93 | 0,84 | 0,66     | E |
| 215                 | 11010111    | 90         | 32     | 20        | 50 | 31 | 0        | 47 | 34 | 19 | 87                  | 83  | 0,00                    | 1,46 | 1,18 | 1,15     | e |
| 217                 | 11011001    | 90         | 224    | 15        | 13 | 72 | 3        | 15 | 75 | 7  | 69                  | 92  | 0,12                    | 0,47 | 2,57 | 0,44     | H |
| 219                 | 11011011    | 90         | 75     | 19        | 40 | 42 | 0        | 33 | 44 | 23 | 75                  | 91  | 0,00                    | 1,04 | 1,51 | 1,39     | h |
| 221                 | 11011101    | 90         | 55     | 14        | 43 | 43 | 5        | 44 | 42 | 9  | 88                  | 96  | 0,24                    | 1,36 | 1,44 | 0,56     | h |
| 227                 | 11100011    | 90         | 141    | 29        | 44 | 27 | 3        | 39 | 21 | 37 | 71                  | 79  | 0,13                    | 1,22 | 0,73 | 2,26     | M |
| 229                 | 11100101    | 90         | 109    | 27        | 52 | 21 | 0        | 46 | 23 | 31 | 76                  | 77  | 0,00                    | 1,43 | 0,79 | 1,92     | m |
| 231                 | 11100111    | 90         | 53     | 23        | 51 | 26 | 0        | 42 | 32 | 26 | 85                  | 68  | 0,00                    | 1,30 | 1,10 | 1,62     | m |
| 233                 | 11101001    | 70         | 118    | 25        | 52 | 24 | 0        | 63 | 21 | 16 | 69                  | 89  | 0,00                    | 2,07 | 0,70 | 0,98     | E |
| 235                 | 11101011    | 90         | 44     | 21        | 67 | 11 | 0        | 75 | 11 | 14 | 84                  | 85  | 0,00                    | 2,34 | 0,39 | 0,84     | E |
| 237                 | 11101101    | 90         | 54     | 24        | 53 | 23 | 2        | 50 | 22 | 26 | 78                  | 92  | 0,08                    | 1,56 | 0,76 | 1,59     | m |
| 241                 | 11110001    | 90         | 139    | 31        | 52 | 16 | 1        | 54 | 12 | 33 | 66                  | 89  | 0,06                    | 1,69 | 0,40 | 2,03     | m |
| 243                 | 11110011    | 90         | 70     | 23        | 54 | 23 | 1        | 61 | 21 | 16 | 74                  | 91  | 0,06                    | 1,92 | 0,74 | 0,97     | E |
| 245                 | 11110101    | 90         | 50     | 22        | 65 | 13 | 4        | 76 | 8  | 12 | 80                  | 100 | 0,18                    | 2,38 | 0,27 | 0,74     | E |
| 249                 | 11111001    | 90         | 48     | 21        | 59 | 20 | 0        | 69 | 21 | 10 | 77                  | 88  | 0,00                    | 2,15 | 0,71 | 0,64     | E |
| 273                 | 100010001   | 90         | 245    | 31        | 10 | 59 | 10       | 11 | 64 | 15 | 45                  | 84  | 0,43                    | 0,36 | 2,19 | 0,93     | H |
| 275                 | 100010011   | 90         | 237    | 22        | 9  | 69 | 6        | 8  | 70 | 15 | 51                  | 90  | 0,28                    | 0,26 | 2,42 | 0,91     | H |
| 277                 | 100010101   | 90         | 159    | 31        | 33 | 36 | 4        | 40 | 38 | 18 | 66                  | 82  | 0,17                    | 1,24 | 1,32 | 1,12     | h |
| 279                 | 100010111   | 90         | 98     | 27        | 37 | 36 | 4        | 38 | 34 | 24 | 67                  | 91  | 0,18                    | 1,18 | 1,16 | 1,50     | m |
| 281                 | 100011001   | 90         | 157    | 27        | 13 | 60 | 5        | 20 | 61 | 14 | 48                  | 88  | 0,23                    | 0,62 | 2,10 | 0,86     | H |
| 283                 | 100011011   | 90         | 133    | 20        | 27 | 53 | 1        | 32 | 52 | 15 | 67                  | 89  | 0,03                    | 1,01 | 1,78 | 0,92     | h |
| 285                 | 100011101   | 90         | 50     | 44        | 43 | 13 | 0        | 56 | 12 | 32 | 51                  | 76  | 0,00                    | 1,75 | 0,41 | 1,97     | m |
| 291                 | 100100011   | 90         | 151    | 25        | 17 | 58 | 5        | 15 | 54 | 25 | 62                  | 89  | 0,23                    | 0,48 | 1,86 | 1,55     | h |
| 293                 | 100100101   | 90         | 135    | 35        | 26 | 40 | 7        | 25 | 36 | 33 | 55                  | 80  | 0,30                    | 0,79 | 1,22 | 2,00     | m |
| 295                 | 100100111   | 90         | 113    | 19        | 43 | 38 | 0        | 44 | 38 | 18 | 78                  | 91  | 0,00                    | 1,38 | 1,31 | 1,09     | e |

| HYDROPHOBIC CLUSTER |             | redundancy | number | frequency |    |    |          |    |    |    |                     |     |                         |      |      | affinity |   |
|---------------------|-------------|------------|--------|-----------|----|----|----------|----|----|----|---------------------|-----|-------------------------|------|------|----------|---|
| P-code              | binary code |            |        | APC rule  |    |    | OPS rule |    |    |    | coverage (OPS rule) |     | propensities (OPS rule) |      |      |          |   |
|                     |             |            |        | C         | E  | H  | C        | E  | H  | M  | E                   | H   | C                       | E    | H    |          | M |
| 297                 | 100101001   | 90         | 125    | 39        | 30 | 31 | 8        | 31 | 28 | 33 | 60                  | 73  | 0,35                    | 0,98 | 0,96 | 2,01     | M |
| 299                 | 100101011   | 90         | 95     | 27        | 48 | 25 | 3        | 45 | 18 | 34 | 77                  | 77  | 0,14                    | 1,41 | 0,61 | 2,07     | m |
| 301                 | 100101101   | 90         | 65     | 28        | 57 | 14 | 2        | 65 | 15 | 18 | 73                  | 71  | 0,07                    | 2,02 | 0,53 | 1,13     | e |
| 303                 | 100101111   | 90         | 35     | 22        | 55 | 24 | 0        | 49 | 14 | 37 | 75                  | 100 | 0,00                    | 1,52 | 0,49 | 2,28     | m |
| 305                 | 100110001   | 90         | 228    | 21        | 50 | 30 | 5        | 15 | 63 | 16 | 68                  | 88  | 0,23                    | 0,48 | 2,17 | 1,00     | H |
| 307                 | 100110011   | 70         | 144    | 13        | 10 | 77 | 2        | 13 | 80 | 5  | 67                  | 93  | 0,09                    | 0,43 | 2,64 | 0,30     | H |
| 309                 | 100110101   | 90         | 97     | 29        | 41 | 30 | 2        | 52 | 30 | 16 | 65                  | 85  | 0,09                    | 1,61 | 1,03 | 1,01     | e |
| 311                 | 100110111   | 90         | 39     | 15        | 23 | 62 | 3        | 23 | 64 | 10 | 79                  | 96  | 0,11                    | 0,72 | 2,20 | 0,63     | H |
| 313                 | 100111001   | 90         | 89     | 26        | 34 | 40 | 2        | 46 | 39 | 12 | 62                  | 93  | 0,10                    | 1,44 | 1,35 | 0,76     | e |
| 315                 | 100111011   | 85         | 46     | 15        | 29 | 56 | 0        | 30 | 59 | 11 | 74                  | 93  | 0,00                    | 0,97 | 1,99 | 0,67     | H |
| 325                 | 101000101   | 75         | 111    | 36        | 40 | 23 | 7        | 35 | 20 | 38 | 69                  | 78  | 0,31                    | 1,15 | 0,66 | 2,31     | M |
| 327                 | 101000111   | 90         | 63     | 36        | 41 | 24 | 2        | 44 | 21 | 33 | 61                  | 80  | 0,07                    | 1,39 | 0,71 | 2,05     | m |
| 329                 | 101001001   | 90         | 123    | 36        | 29 | 36 | 6        | 32 | 35 | 28 | 59                  | 75  | 0,25                    | 0,99 | 1,20 | 1,70     | m |
| 331                 | 101001011   | 90         | 70     | 32        | 43 | 25 | 1        | 46 | 21 | 31 | 63                  | 83  | 0,06                    | 1,43 | 0,74 | 1,93     | m |
| 333                 | 101001101   | 90         | 71     | 31        | 33 | 35 | 4        | 30 | 35 | 31 | 70                  | 75  | 0,19                    | 0,92 | 1,21 | 1,90     | m |
| 335                 | 101001111   | 90         | 34     | 30        | 61 | 9  | 0        | 59 | 9  | 32 | 72                  | 63  | 0,00                    | 1,84 | 0,30 | 1,99     | m |
| 337                 | 101010001   | 85         | 153    | 33        | 39 | 28 | 3        | 35 | 27 | 34 | 60                  | 84  | 0,14                    | 1,13 | 0,93 | 2,08     | m |
| 339                 | 101010011   | 90         | 60     | 22        | 32 | 46 | 0        | 35 | 38 | 27 | 71                  | 94  | 0,00                    | 1,09 | 1,32 | 1,64     | m |
| 341                 | 101010101   | 90         | 48     | 22        | 57 | 21 | 4        | 50 | 19 | 27 | 88                  | 83  | 0,18                    | 1,56 | 0,64 | 1,66     | m |
| 345                 | 101011001   | 90         | 80     | 25        | 37 | 37 | 0        | 45 | 38 | 18 | 65                  | 86  | 0,00                    | 1,41 | 1,29 | 1,07     | e |
| 355                 | 101100011   | 90         | 83     | 37        | 34 | 29 | 6        | 41 | 25 | 28 | 55                  | 78  | 0,27                    | 1,28 | 0,87 | 1,70     | m |
| 357                 | 101100101   | 90         | 83     | 28        | 35 | 37 | 4        | 31 | 41 | 24 | 81                  | 76  | 0,16                    | 0,98 | 1,41 | 1,48     | m |
| 359                 | 101100111   | 80         | 33     | 20        | 35 | 45 | 0        | 33 | 42 | 24 | 82                  | 89  | 0,00                    | 1,08 | 1,42 | 1,48     | m |
| 361                 | 101101001   | 90         | 71     | 30        | 49 | 21 | 0        | 48 | 21 | 31 | 71                  | 70  | 0,00                    | 1,50 | 0,73 | 1,90     | m |
| 363                 | 101101011   | 80         | 32     | 20        | 61 | 18 | 0        | 59 | 13 | 28 | 80                  | 92  | 0,00                    | 1,92 | 0,42 | 1,72     | e |
| 369                 | 101110001   | 90         | 62     | 26        | 45 | 29 | 2        | 52 | 31 | 16 | 70                  | 80  | 0,07                    | 1,61 | 1,05 | 0,99     | e |
| 371                 | 101110011   | 90         | 57     | 20        | 23 | 57 | 2        | 37 | 54 | 7  | 62                  | 95  | 0,08                    | 1,15 | 1,87 | 0,43     | h |
| 393                 | 110001001   | 90         | 182    | 30        | 15 | 55 | 4        | 15 | 54 | 26 | 51                  | 82  | 0,19                    | 0,46 | 1,87 | 1,62     | h |
| 395                 | 110001011   | 90         | 111    | 26        | 26 | 48 | 6        | 19 | 44 | 31 | 71                  | 87  | 0,28                    | 0,59 | 1,51 | 1,88     | m |
| 397                 | 110001101   | 90         | 81     | 26        | 32 | 42 | 4        | 36 | 38 | 22 | 69                  | 88  | 0,16                    | 1,12 | 1,31 | 1,36     | m |
| 399                 | 110001111   | 90         | 42     | 29        | 56 | 16 | 5        | 52 | 12 | 31 | 72                  | 84  | 0,21                    | 1,64 | 0,41 | 1,90     | m |
| 401                 | 110010001   | 90         | 230    | 22        | 9  | 69 | 4        | 12 | 67 | 16 | 46                  | 91  | 0,19                    | 0,38 | 2,31 | 0,99     | H |
| 403                 | 110010011   | 90         | 155    | 18        | 11 | 71 | 3        | 10 | 69 | 18 | 61                  | 90  | 0,11                    | 0,32 | 2,37 | 1,11     | H |
| 405                 | 110010101   | 90         | 75     | 21        | 33 | 46 | 4        | 31 | 48 | 17 | 79                  | 88  | 0,18                    | 0,96 | 1,65 | 1,06     | h |
| 407                 | 110010111   | 90         | 39     | 14        | 23 | 64 | 3        | 23 | 59 | 15 | 81                  | 94  | 0,11                    | 0,72 | 2,02 | 0,94     | H |
| 409                 | 110011001   | 90         | 164    | 13        | 11 | 76 | 2        | 11 | 76 | 12 | 75                  | 91  | 0,08                    | 0,34 | 2,59 | 0,71     | H |
| 411                 | 110011011   | 90         | 69     | 8         | 7  | 84 | 0        | 9  | 84 | 7  | 70                  | 95  | 0,00                    | 0,27 | 2,88 | 0,45     | H |
| 413                 | 110011101   | 85         | 38     | 22        | 26 | 52 | 0        | 29 | 53 | 18 | 54                  | 95  | 0,00                    | 0,92 | 1,78 | 1,13     | h |
| 419                 | 110100011   | 90         | 93     | 24        | 27 | 49 | 3        | 27 | 52 | 18 | 71                  | 87  | 0,14                    | 0,84 | 1,77 | 1,12     | h |
| 421                 | 110100101   | 90         | 86     | 37        | 40 | 23 | 5        | 35 | 17 | 43 | 62                  | 64  | 0,21                    | 1,09 | 0,60 | 2,64     | M |
| 423                 | 110100111   | 90         | 50     | 17        | 40 | 43 | 2        | 34 | 38 | 26 | 80                  | 91  | 0,09                    | 1,06 | 1,30 | 1,60     | m |
| 425                 | 110101001   | 90         | 87     | 27        | 48 | 26 | 1        | 49 | 29 | 21 | 73                  | 78  | 0,05                    | 1,54 | 0,99 | 1,27     | e |
| 427                 | 110101011   | 90         | 37     | 23        | 51 | 26 | 3        | 49 | 24 | 24 | 80                  | 89  | 0,12                    | 1,52 | 0,83 | 1,49     | e |
| 433                 | 110110001   | 90         | 101    | 16        | 17 | 67 | 1        | 16 | 67 | 16 | 63                  | 93  | 0,04                    | 0,50 | 2,31 | 0,97     | H |
| 435                 | 110110011   | 75         | 72     | 7         | 26 | 67 | 0        | 25 | 68 | 7  | 94                  | 94  | 0,00                    | 0,82 | 2,26 | 0,42     | H |
| 437                 | 110110101   | 90         | 30     | 27        | 35 | 38 | 0        | 47 | 40 | 13 | 65                  | 84  | 0,00                    | 1,46 | 1,37 | 0,82     | e |
| 441                 | 110111001   | 90         | 33     | 8         | 20 | 72 | 0        | 18 | 76 | 6  | 81                  | 96  | 0,00                    | 0,57 | 2,60 | 0,37     | H |
| 453                 | 111000101   | 90         | 68     | 35        | 42 | 23 | 0        | 41 | 28 | 31 | 62                  | 66  | 0,00                    | 1,29 | 0,96 | 1,90     | m |
| 455                 | 111000111   | 90         | 39     | 24        | 53 | 23 | 3        | 21 | 15 | 62 | 67                  | 98  | 0,11                    | 0,64 | 0,53 | 3,78     | M |
| 457                 | 111001001   | 90         | 86     | 25        | 32 | 42 | 3        | 33 | 42 | 22 | 73                  | 85  | 0,15                    | 1,02 | 1,44 | 1,36     | h |
| 459                 | 111001011   | 90         | 45     | 16        | 30 | 54 | 0        | 27 | 47 | 27 | 76                  | 94  | 0,00                    | 0,83 | 1,60 | 1,64     | m |
| 461                 | 111001101   | 90         | 33     | 19        | 43 | 37 | 0        | 48 | 27 | 24 | 73                  | 90  | 0,00                    | 1,52 | 0,94 | 1,49     | e |
| 465                 | 111010001   | 90         | 60     | 30        | 44 | 26 | 5        | 40 | 22 | 33 | 70                  | 79  | 0,22                    | 1,25 | 0,74 | 2,05     | m |
| 467                 | 111010011   | 90         | 39     | 21        | 32 | 47 | 0        | 36 | 46 | 18 | 72                  | 85  | 0,00                    | 1,12 | 1,58 | 1,10     | h |
| 473                 | 111011001   | 90         | 58     | 12        | 37 | 50 | 0        | 40 | 52 | 9  | 84                  | 92  | 0,00                    | 1,24 | 1,78 | 0,53     | h |
| 483                 | 111100011   | 90         | 45     | 30        | 45 | 25 | 2        | 40 | 20 | 38 | 65                  | 79  | 0,10                    | 1,25 | 0,69 | 2,32     | M |
| 485                 | 111100101   | 90         | 34     | 18        | 70 | 12 | 0        | 68 | 9  | 24 | 82                  | 93  | 0,00                    | 2,11 | 0,30 | 1,44     | e |
| 489                 | 111101001   | 75         | 31     | 22        | 59 | 19 | 0        | 55 | 0  | 45 | 71                  | 0   | 0,00                    | 1,80 | 0,00 | 2,76     | m |
| 497                 | 111110001   | 90         | 30     | 27        | 60 | 13 | 0        | 53 | 10 | 37 | 67                  | 85  | 0,00                    | 1,67 | 0,34 | 2,25     | m |

| HYDROPHOBIC CLUSTER |             | redundancy | number | frequency |    |    |          |    |    |    |                     |    |                         |      |      | affinity |   |
|---------------------|-------------|------------|--------|-----------|----|----|----------|----|----|----|---------------------|----|-------------------------|------|------|----------|---|
| P-code              | binary code |            |        | APC rule  |    |    | OPS rule |    |    |    | coverage (OPS rule) |    | propensities (OPS rule) |      |      |          |   |
|                     |             |            |        | C         | E  | H  | C        | E  | H  | M  | E                   | H  | C                       | E    | H    |          | M |
| 547                 | 1000100011  | 90         | 82     | 35        | 18 | 46 | 5        | 18 | 44 | 33 | 48                  | 78 | 0,22                    | 0,57 | 1,51 | 2,02     | m |
| 549                 | 1000100101  | 90         | 108    | 34        | 32 | 34 | 6        | 31 | 37 | 27 | 70                  | 77 | 0,25                    | 0,95 | 1,27 | 1,65     | m |
| 551                 | 1000100111  | 90         | 42     | 29        | 33 | 38 | 7        | 29 | 36 | 29 | 73                  | 87 | 0,32                    | 0,89 | 1,23 | 1,75     | m |
| 553                 | 1000101001  | 90         | 93     | 40        | 32 | 28 | 4        | 30 | 25 | 41 | 62                  | 59 | 0,19                    | 0,94 | 0,85 | 2,51     | M |
| 555                 | 1000101011  | 90         | 46     | 29        | 37 | 34 | 0        | 39 | 26 | 35 | 69                  | 68 | 0,00                    | 1,22 | 0,90 | 2,14     | m |
| 557                 | 1000101101  | 90         | 47     | 34        | 38 | 28 | 2        | 38 | 28 | 32 | 57                  | 82 | 0,09                    | 1,20 | 0,95 | 1,96     | m |
| 561                 | 1000110001  | 90         | 99     | 37        | 20 | 43 | 4        | 22 | 45 | 28 | 52                  | 77 | 0,18                    | 0,69 | 1,56 | 1,74     | m |
| 563                 | 1000110011  | 90         | 64     | 19        | 10 | 70 | 0        | 9  | 77 | 14 | 53                  | 87 | 0,00                    | 0,29 | 2,63 | 0,86     | H |
| 565                 | 1000110101  | 90         | 60     | 36        | 47 | 17 | 0        | 60 | 18 | 22 | 60                  | 77 | 0,00                    | 1,88 | 0,63 | 1,33     | e |
| 569                 | 1000111001  | 90         | 59     | 27        | 31 | 42 | 0        | 41 | 37 | 22 | 59                  | 85 | 0,00                    | 1,27 | 1,28 | 1,35     | m |
| 573                 | 1000111101  | 90         | 48     | 33        | 59 | 9  | 0        | 63 | 8  | 29 | 63                  | 90 | 0,00                    | 1,95 | 0,29 | 1,79     | e |
| 581                 | 1001000101  | 90         | 108    | 32        | 14 | 54 | 8        | 11 | 60 | 20 | 56                  | 80 | 0,37                    | 0,35 | 2,07 | 1,25     | h |
| 583                 | 1001000111  | 90         | 44     | 33        | 32 | 35 | 2        | 25 | 32 | 41 | 58                  | 80 | 0,10                    | 0,78 | 1,09 | 2,51     | M |
| 585                 | 1001001001  | 90         | 95     | 35        | 17 | 48 | 3        | 16 | 43 | 38 | 52                  | 75 | 0,14                    | 0,49 | 1,48 | 2,33     | m |
| 587                 | 1001001011  | 90         | 36     | 40        | 27 | 33 | 6        | 25 | 33 | 36 | 52                  | 65 | 0,25                    | 0,78 | 1,14 | 2,22     | M |
| 589                 | 1001001101  | 90         | 69     | 25        | 18 | 56 | 3        | 20 | 57 | 20 | 61                  | 84 | 0,13                    | 0,63 | 1,94 | 1,25     | h |
| 593                 | 1001010001  | 90         | 83     | 44        | 25 | 31 | 13       | 19 | 30 | 37 | 54                  | 72 | 0,59                    | 0,60 | 1,03 | 2,29     | M |
| 595                 | 1001010011  | 90         | 47     | 31        | 28 | 41 | 0        | 34 | 40 | 26 | 61                  | 73 | 0,00                    | 1,06 | 1,39 | 1,57     | m |
| 597                 | 1001010101  | 90         | 33     | 30        | 42 | 27 | 3        | 52 | 27 | 18 | 67                  | 83 | 0,13                    | 1,61 | 0,94 | 1,12     | e |
| 599                 | 1001010111  | 90         | 31     | 29        | 42 | 29 | 0        | 48 | 16 | 35 | 64                  | 82 | 0,00                    | 1,51 | 0,55 | 2,18     | m |
| 601                 | 1001011001  | 90         | 44     | 23        | 24 | 53 | 0        | 27 | 64 | 9  | 76                  | 80 | 0,00                    | 0,85 | 2,18 | 0,56     | H |
| 611                 | 1001100011  | 90         | 54     | 31        | 20 | 49 | 7        | 22 | 39 | 31 | 63                  | 85 | 0,33                    | 0,69 | 1,33 | 1,93     | m |
| 613                 | 1001100101  | 90         | 92     | 25        | 18 | 57 | 1        | 13 | 54 | 32 | 74                  | 80 | 0,05                    | 0,41 | 1,87 | 1,94     | m |
| 617                 | 1001101001  | 90         | 58     | 35        | 26 | 39 | 2        | 24 | 38 | 36 | 52                  | 74 | 0,08                    | 0,75 | 1,30 | 2,22     | m |
| 621                 | 1001101101  | 90         | 31     | 23        | 31 | 46 | 6        | 29 | 45 | 19 | 83                  | 85 | 0,29                    | 0,91 | 1,55 | 1,19     | h |
| 625                 | 1001110001  | 90         | 45     | 30        | 33 | 36 | 0        | 38 | 40 | 22 | 65                  | 73 | 0,00                    | 1,18 | 1,37 | 1,36     | h |
| 649                 | 1010001001  | 90         | 92     | 37        | 25 | 39 | 7        | 20 | 34 | 40 | 57                  | 74 | 0,29                    | 0,61 | 1,16 | 2,47     | M |
| 651                 | 1010001011  | 90         | 43     | 42        | 34 | 23 | 5        | 26 | 21 | 49 | 57                  | 62 | 0,21                    | 0,80 | 0,72 | 3,00     | M |
| 653                 | 1010001101  | 90         | 43     | 37        | 34 | 29 | 0        | 33 | 26 | 42 | 44                  | 85 | 0,00                    | 1,02 | 0,88 | 2,57     | M |
| 657                 | 1010010001  | 90         | 79     | 28        | 23 | 48 | 6        | 22 | 47 | 25 | 72                  | 82 | 0,28                    | 0,67 | 1,61 | 1,55     | h |
| 659                 | 1010010011  | 85         | 53     | 28        | 12 | 60 | 4        | 9  | 53 | 34 | 54                  | 76 | 0,17                    | 0,30 | 1,79 | 2,08     | m |
| 661                 | 1010010101  | 90         | 52     | 35        | 51 | 14 | 8        | 48 | 12 | 33 | 70                  | 77 | 0,34                    | 1,50 | 0,40 | 2,01     | m |
| 665                 | 1010011001  | 90         | 78     | 27        | 15 | 58 | 5        | 15 | 56 | 23 | 63                  | 82 | 0,23                    | 0,48 | 1,94 | 1,42     | h |
| 667                 | 1010011011  | 90         | 33     | 21        | 12 | 67 | 3        | 12 | 64 | 21 | 60                  | 83 | 0,13                    | 0,38 | 2,18 | 1,30     | h |
| 675                 | 1010100011  | 90         | 53     | 35        | 30 | 34 | 2        | 17 | 32 | 49 | 61                  | 76 | 0,08                    | 0,53 | 1,10 | 3,01     | M |
| 677                 | 1010100101  | 90         | 49     | 32        | 47 | 21 | 2        | 41 | 24 | 33 | 72                  | 73 | 0,09                    | 1,28 | 0,84 | 2,01     | m |
| 681                 | 1010101001  | 90         | 55     | 29        | 44 | 27 | 5        | 45 | 22 | 27 | 69                  | 91 | 0,24                    | 1,42 | 0,75 | 1,67     | m |
| 689                 | 1010110001  | 90         | 63     | 32        | 45 | 23 | 3        | 46 | 22 | 29 | 68                  | 86 | 0,14                    | 1,44 | 0,76 | 1,75     | m |
| 709                 | 1011000101  | 90         | 53     | 33        | 40 | 27 | 0        | 34 | 30 | 36 | 69                  | 71 | 0,00                    | 1,06 | 1,04 | 2,20     | M |
| 713                 | 1011001001  | 90         | 62     | 25        | 24 | 51 | 0        | 13 | 55 | 32 | 54                  | 83 | 0,00                    | 0,40 | 1,88 | 1,98     | m |
| 721                 | 1011010001  | 80         | 33     | 34        | 36 | 29 | 3        | 33 | 24 | 39 | 63                  | 74 | 0,13                    | 1,08 | 0,81 | 2,41     | M |
| 729                 | 1011011001  | 90         | 35     | 28        | 34 | 38 | 3        | 49 | 26 | 23 | 59                  | 91 | 0,13                    | 1,52 | 0,88 | 1,40     | e |
| 785                 | 1100010001  | 90         | 81     | 30        | 10 | 60 | 4        | 9  | 58 | 30 | 61                  | 81 | 0,16                    | 0,27 | 1,99 | 1,82     | h |
| 787                 | 1100010011  | 90         | 67     | 18        | 9  | 74 | 3        | 6  | 73 | 18 | 50                  | 90 | 0,13                    | 0,19 | 2,51 | 1,10     | H |
| 789                 | 1100010101  | 90         | 44     | 24        | 37 | 39 | 0        | 27 | 34 | 39 | 74                  | 89 | 0,00                    | 0,85 | 1,17 | 2,37     | M |
| 793                 | 1100011001  | 90         | 59     | 26        | 17 | 57 | 3        | 17 | 56 | 24 | 65                  | 83 | 0,15                    | 0,53 | 1,92 | 1,46     | h |
| 795                 | 1100011011  | 90         | 31     | 21        | 21 | 58 | 0        | 13 | 58 | 29 | 53                  | 88 | 0,00                    | 0,40 | 1,99 | 1,78     | h |
| 803                 | 1100100011  | 90         | 41     | 24        | 11 | 65 | 0        | 15 | 61 | 24 | 38                  | 86 | 0,00                    | 0,46 | 2,09 | 1,50     | h |
| 805                 | 1100100101  | 90         | 71     | 30        | 23 | 47 | 6        | 20 | 48 | 27 | 74                  | 80 | 0,25                    | 0,62 | 1,64 | 1,64     | H |
| 807                 | 1100100111  | 90         | 33     | 22        | 38 | 40 | 3        | 33 | 36 | 27 | 78                  | 89 | 0,13                    | 1,04 | 1,25 | 1,67     | m |
| 809                 | 1100101001  | 90         | 52     | 32        | 37 | 31 | 4        | 35 | 21 | 40 | 68                  | 89 | 0,17                    | 1,08 | 0,73 | 2,48     | M |
| 811                 | 1100101011  | 90         | 40     | 21        | 42 | 37 | 0        | 33 | 20 | 48 | 75                  | 91 | 0,00                    | 1,02 | 0,69 | 2,92     | M |
| 817                 | 1100110001  | 90         | 64     | 24        | 8  | 68 | 5        | 11 | 73 | 11 | 67                  | 82 | 0,21                    | 0,34 | 2,52 | 0,67     | H |
| 819                 | 1100110011  | 90         | 34     | 9         | 5  | 86 | 0        | 0  | 88 | 12 | 0                   | 92 | 0,00                    | 0,00 | 3,03 | 0,72     | H |
| 821                 | 1100110101  | 90         | 31     | 24        | 28 | 48 | 0        | 26 | 52 | 23 | 84                  | 81 | 0,00                    | 0,81 | 1,77 | 1,39     | h |
| 837                 | 1101000101  | 90         | 53     | 28        | 36 | 36 | 0        | 23 | 32 | 45 | 78                  | 76 | 0,00                    | 0,71 | 1,10 | 2,78     | M |
| 841                 | 1101001001  | 90         | 62     | 39        | 30 | 31 | 3        | 18 | 23 | 56 | 60                  | 64 | 0,14                    | 0,55 | 0,77 | 3,47     | M |
| 849                 | 1101010001  | 80         | 42     | 26        | 50 | 24 | 0        | 43 | 31 | 26 | 82                  | 66 | 0,00                    | 1,39 | 1,04 | 1,60     | m |
| 905                 | 1110001001  | 90         | 52     | 42        | 31 | 27 | 6        | 42 | 29 | 23 | 52                  | 79 | 0,26                    | 1,32 | 0,99 | 1,42     | m |

| HYDROPHOBIC CLUSTER |               | redundancy | number | frequency |    |    |          |    |    |    |                     |    |                         |      |      | affinity |   |
|---------------------|---------------|------------|--------|-----------|----|----|----------|----|----|----|---------------------|----|-------------------------|------|------|----------|---|
| P- code             | binary code   |            |        | APC rule  |    |    | OPS rule |    |    |    | coverage (OPS rule) |    | propensities (OPS rule) |      |      |          |   |
|                     |               |            |        | C         | E  | H  | C        | E  | H  | M  | E                   | H  | C                       | E    | H    |          | M |
| 913                 | 1110010001    | 90         | 53     | 29        | 25 | 46 | 4        | 23 | 49 | 25 | 63                  | 81 | 0,17                    | 0,71 | 1,68 | 1,51     | h |
| 915                 | 1110010011    | 85         | 39     | 14        | 31 | 54 | 3        | 15 | 41 | 41 | 98                  | 96 | 0,11                    | 0,49 | 1,39 | 2,51     | M |
| 921                 | 1110011001    | 90         | 37     | 24        | 23 | 53 | 3        | 22 | 59 | 16 | 58                  | 87 | 0,12                    | 0,68 | 2,04 | 1,00     | H |
| 965                 | 1111000101    | 90         | 39     | 29        | 50 | 21 | 0        | 38 | 21 | 41 | 70                  | 68 | 0,00                    | 1,20 | 0,70 | 2,52     | M |
| 1093                | 10001000101   | 75         | 56     | 35        | 22 | 43 | 5        | 11 | 48 | 36 | 61                  | 78 | 0,23                    | 0,35 | 1,60 | 2,18     | m |
| 1097                | 10001001001   | 90         | 64     | 29        | 7  | 64 | 2        | 6  | 70 | 22 | 34                  | 81 | 0,07                    | 0,20 | 2,41 | 1,34     | H |
| 1101                | 10001001101   | 90         | 53     | 24        | 15 | 61 | 2        | 6  | 57 | 36 | 70                  | 85 | 0,08                    | 0,18 | 1,94 | 2,20     | m |
| 1105                | 10001010001   | 90         | 53     | 28        | 19 | 53 | 6        | 13 | 51 | 30 | 68                  | 83 | 0,25                    | 0,41 | 1,75 | 1,85     | m |
| 1113                | 10001011001   | 90         | 48     | 20        | 12 | 67 | 0        | 15 | 69 | 17 | 55                  | 88 | 0,00                    | 0,46 | 2,36 | 1,02     | H |
| 1125                | 10001100101   | 90         | 31     | 41        | 21 | 37 | 0        | 16 | 42 | 42 | 44                  | 67 | 0,00                    | 0,50 | 1,44 | 2,58     | M |
| 1129                | 10001101001   | 90         | 32     | 29        | 32 | 39 | 3        | 16 | 22 | 59 | 65                  | 88 | 0,14                    | 0,49 | 0,75 | 3,65     | M |
| 1161                | 10010001001   | 90         | 86     | 20        | 8  | 72 | 2        | 6  | 77 | 15 | 58                  | 86 | 0,10                    | 0,18 | 2,63 | 0,93     | H |
| 1163                | 10010001011   | 85         | 50     | 25        | 18 | 57 | 0        | 10 | 50 | 40 | 40                  | 88 | 0,00                    | 0,32 | 1,69 | 2,45     | m |
| 1165                | 10010001101   | 90         | 40     | 24        | 16 | 60 | 3        | 10 | 60 | 28 | 57                  | 85 | 0,11                    | 0,31 | 2,06 | 1,69     | h |
| 1169                | 10010010001   | 90         | 79     | 26        | 14 | 60 | 3        | 13 | 61 | 24 | 52                  | 84 | 0,11                    | 0,40 | 2,09 | 1,48     | h |
| 1171                | 10010010011   | 90         | 47     | 28        | 9  | 62 | 6        | 6  | 62 | 26 | 58                  | 78 | 0,28                    | 0,20 | 2,12 | 1,57     | h |
| 1173                | 10010010101   | 90         | 38     | 28        | 42 | 30 | 0        | 37 | 21 | 42 | 68                  | 82 | 0,00                    | 1,15 | 0,72 | 2,59     | M |
| 1177                | 10010011001   | 90         | 58     | 17        | 5  | 78 | 2        | 3  | 74 | 21 | 36                  | 88 | 0,08                    | 0,11 | 2,54 | 1,27     | H |
| 1193                | 10010101001   | 90         | 42     | 34        | 34 | 32 | 0        | 33 | 31 | 36 | 60                  | 73 | 0,00                    | 1,04 | 1,06 | 2,19     | M |
| 1221                | 10011000101   | 90         | 51     | 25        | 10 | 65 | 2        | 10 | 73 | 16 | 58                  | 80 | 0,09                    | 0,31 | 2,49 | 0,96     | H |
| 1225                | 10011001001   | 90         | 58     | 13        | 2  | 85 | 0        | 0  | 86 | 14 | 0                   | 89 | 0,00                    | 0,00 | 2,96 | 0,85     | H |
| 1233                | 10011010001   | 90         | 54     | 27        | 18 | 56 | 0        | 20 | 63 | 17 | 58                  | 82 | 0,00                    | 0,64 | 2,16 | 1,02     | H |
| 1241                | 10011011001   | 90         | 34     | 10        | 3  | 87 | 0        | 26 | 52 | 23 | 84                  | 81 | 0,00                    | 0,81 | 1,77 | 1,39     | h |
| 1297                | 10100010001   | 90         | 50     | 35        | 21 | 44 | 2        | 18 | 40 | 40 | 54                  | 79 | 0,09                    | 0,56 | 1,37 | 2,46     | M |
| 1299                | 10100010011   | 90         | 43     | 37        | 18 | 45 | 7        | 12 | 44 | 37 | 49                  | 86 | 0,31                    | 0,36 | 1,52 | 2,29     | m |
| 1305                | 10100011001   | 90         | 42     | 26        | 21 | 54 | 0        | 12 | 52 | 36 | 62                  | 84 | 0,00                    | 0,37 | 1,80 | 2,19     | m |
| 1321                | 10100101001   | 90         | 40     | 32        | 43 | 25 | 5        | 33 | 13 | 50 | 73                  | 69 | 0,22                    | 1,02 | 0,43 | 3,07     | M |
| 1329                | 10100110001   | 90         | 43     | 21        | 19 | 60 | 2        | 14 | 51 | 33 | 85                  | 83 | 0,10                    | 0,44 | 1,76 | 2,00     | m |
| 1349                | 10101000101   | 85         | 39     | 44        | 37 | 19 | 3        | 26 | 18 | 54 | 44                  | 68 | 0,11                    | 0,82 | 0,61 | 3,30     | M |
| 1353                | 10101001001   | 85         | 40     | 38        | 27 | 35 | 3        | 33 | 33 | 33 | 46                  | 83 | 0,11                    | 1,04 | 1,10 | 1,99     | m |
| 1417                | 10110001001   | 90         | 57     | 30        | 23 | 47 | 7        | 23 | 32 | 39 | 53                  | 85 | 0,31                    | 0,71 | 1,08 | 2,37     | M |
| 1425                | 10110010001   | 90         | 45     | 23        | 14 | 63 | 2        | 11 | 58 | 29 | 47                  | 90 | 0,10                    | 0,35 | 1,98 | 1,77     | h |
| 1571                | 11000100011   | 80         | 38     | 35        | 23 | 41 | 0        | 11 | 32 | 58 | 50                  | 73 | 0,00                    | 0,34 | 1,06 | 3,54     | M |
| 1573                | 11000100101   | 90         | 32     | 37        | 28 | 35 | 0        | 25 | 38 | 38 | 51                  | 70 | 0,00                    | 0,78 | 1,29 | 2,30     | M |
| 1577                | 11000101001   | 90         | 33     | 37        | 33 | 30 | 3        | 15 | 18 | 64 | 49                  | 86 | 0,13                    | 0,47 | 0,62 | 3,91     | M |
| 1585                | 11000110001   | 90         | 33     | 29        | 31 | 40 | 0        | 24 | 36 | 39 | 80                  | 73 | 0,00                    | 0,76 | 1,25 | 2,42     | M |
| 1605                | 11001000101   | 90         | 51     | 32        | 22 | 46 | 4        | 10 | 47 | 39 | 75                  | 75 | 0,17                    | 0,31 | 1,61 | 2,41     | m |
| 1609                | 11001001001   | 90         | 31     | 30        | 11 | 59 | 0        | 3  | 52 | 45 | 55                  | 75 | 0,00                    | 0,10 | 1,77 | 2,77     | m |
| 1617                | 11001010001   | 90         | 30     | 29        | 33 | 38 | 0        | 30 | 27 | 43 | 58                  | 90 | 0,00                    | 0,94 | 0,92 | 2,66     | M |
| 1637                | 11001100101   | 90         | 33     | 30        | 9  | 61 | 12       | 15 | 67 | 6  | 60                  | 84 | 0,54                    | 0,47 | 2,29 | 0,37     | H |
| 1673                | 11010001001   | 90         | 72     | 29        | 17 | 55 | 3        | 10 | 54 | 33 | 58                  | 85 | 0,12                    | 0,30 | 1,86 | 2,05     | m |
| 1809                | 11100010001   | 90         | 32     | 24        | 28 | 48 | 3        | 9  | 44 | 44 | 45                  | 64 | 0,14                    | 0,29 | 1,50 | 2,69     | M |
| 2185                | 100010001001  | 90         | 47     | 28        | 5  | 67 | 9        | 4  | 66 | 21 | 42                  | 82 | 0,38                    | 0,13 | 2,26 | 1,31     | h |
| 2193                | 100010010001  | 90         | 71     | 17        | 7  | 77 | 3        | 1  | 75 | 21 | 67                  | 92 | 0,12                    | 0,04 | 2,56 | 1,30     | H |
| 2195                | 100010010011  | 90         | 34     | 12        | 4  | 85 | 0        | 0  | 82 | 18 | 0                   | 93 | 0,00                    | 0,00 | 2,83 | 1,08     | H |
| 2197                | 100010010101  | 90         | 30     | 30        | 44 | 26 | 0        | 23 | 13 | 63 | 60                  | 77 | 0,00                    | 0,73 | 0,46 | 3,89     | M |
| 2201                | 100010011001  | 90         | 54     | 10        | 6  | 84 | 0        | 6  | 87 | 7  | 64                  | 93 | 0,00                    | 0,17 | 2,99 | 0,45     | H |
| 2225                | 100010110001  | 90         | 32     | 19        | 16 | 65 | 6        | 6  | 59 | 28 | 46                  | 97 | 0,28                    | 0,20 | 2,04 | 1,73     | h |
| 2265                | 100011011001  | 90         | 34     | 17        | 14 | 68 | 0        | 9  | 68 | 24 | 61                  | 91 | 0,00                    | 0,28 | 2,32 | 1,44     | h |
| 2321                | 100100010001  | 90         | 49     | 24        | 7  | 69 | 2        | 0  | 63 | 35 | 0                   | 88 | 0,09                    | 0,00 | 2,17 | 2,13     | h |
| 2323                | 100100010011  | 90         | 37     | 11        | 7  | 82 | 3        | 0  | 70 | 27 | 0                   | 97 | 0,12                    | 0,00 | 2,41 | 1,66     | h |
| 2353                | 100100110001  | 90         | 46     | 24        | 13 | 63 | 2        | 15 | 65 | 17 | 58                  | 85 | 0,10                    | 0,48 | 2,24 | 1,07     | H |
| 2449                | 100110010001  | 90         | 79     | 15        | 3  | 82 | 4        | 1  | 86 | 9  | 100                 | 89 | 0,17                    | 0,04 | 2,95 | 0,54     | H |
| 2705                | 101010010001  | 90         | 38     | 36        | 25 | 39 | 8        | 13 | 37 | 42 | 48                  | 70 | 0,35                    | 0,41 | 1,26 | 2,59     | M |
| 3141                | 110001000101  | 70         | 29     | 36        | 34 | 30 | 0        | 10 | 21 | 69 | 61                  | 75 | 0,00                    | 0,34 | 0,69 | 4,21     | M |
| 3209                | 110010001001  | 90         | 46     | 19        | 7  | 74 | 4        | 11 | 70 | 15 | 42                  | 92 | 0,19                    | 0,34 | 2,39 | 0,93     | H |
| 4369                | 1000100010001 | 90         | 30     | 25        | 4  | 71 | 3        | 3  | 77 | 17 | 54                  | 83 | 0,15                    | 0,10 | 2,63 | 1,02     | H |
| 4371                | 1000100010011 | 90         | 34     | 15        | 4  | 81 | 3        | 3  | 68 | 26 | 23                  | 93 | 0,13                    | 0,09 | 2,32 | 1,63     | h |
